# Supplementary material for: Space borne tropospheric nitrogen dioxide (NO 2 ) observations from 2005–2020 over the Yangtze River Delta (YRD), China: variabilities, implications, and drivers
Source: Copernicus journal article supplement (doi:10.5194/acp-2021-1089), 2022-01-10
Supplement: Supplementary file 1 [file acp-2021-1089-supplement.pdf]

# **Supplement: Space borne tropospheric nitrogen dioxide (NO<sub>2</sub>) observations from 2005-2020 over the Yangtze River Delta (YRD), China: variabilities, implications, and drivers**

Hao Yin<sup>1,2</sup>, Youwen Sun<sup>1,†</sup>, Justus Notholt<sup>3</sup>, Mathias Palm<sup>3</sup>, and Cheng Liu<sup>2,4,5,6</sup>

<sup>1</sup>*Key Laboratory of Environmental Optics and Technology, Anhui Institute of Optics and Fine Mechanics, HFIPS, Chinese Academy of Sciences, Hefei 230031, China*

<sup>2</sup>*Department of Precision Machinery and Precision Instrumentation, University of Science and Technology of China, Hefei 230026, China*

<sup>3</sup>*University of Bremen, Institute of Environmental Physics, P. O. Box 330440, 28334 Bremen, Germany*

<sup>4</sup>*Anhui Province Key Laboratory of Polar Environment and Global Change, University of Science and Technology of China, Hefei 230026, China*

<sup>5</sup>*Center for Excellence in Regional Atmospheric Environment, Institute of Urban Environment, Chinese Academy of Sciences, Xiamen 361021, China*

<sup>6</sup>*Key Laboratory of Precision Scientific Instrumentation of Anhui Higher Education Institutes, University of Science and Technology of China, Hefei 230026, China*

<sup>†</sup>Correspondence to: Youwen Sun (ywsun@aiofm.ac.cn)

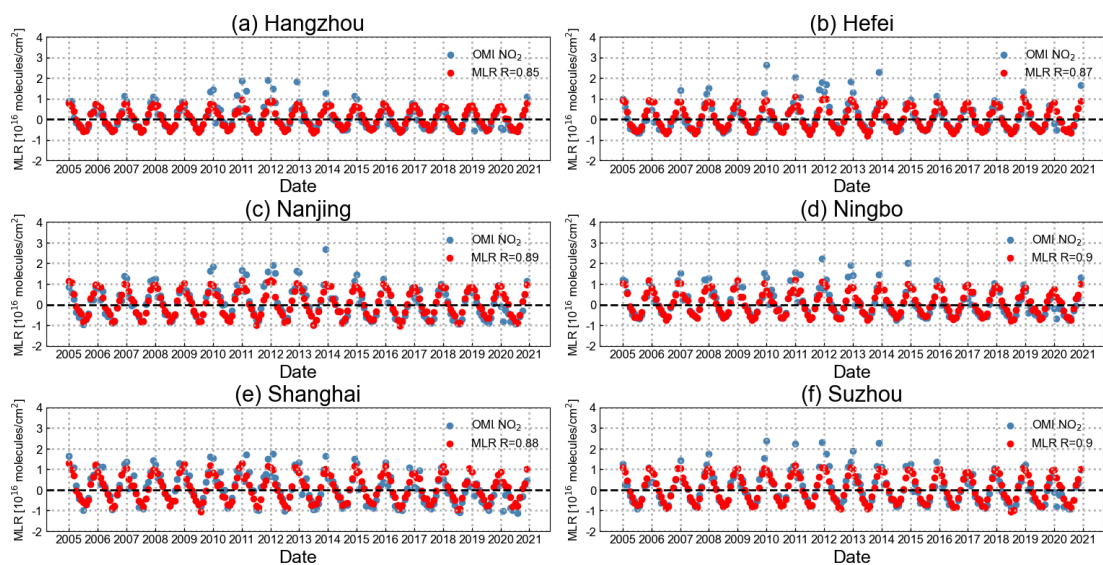

**Figure S1.** The comparisons of time series of monthly averaged OMI tropospheric NO<sub>2</sub> VCDs (blue dots) and the MLR model (red dots) from 2005 to 2020 over the 6 megacities within the YRD.

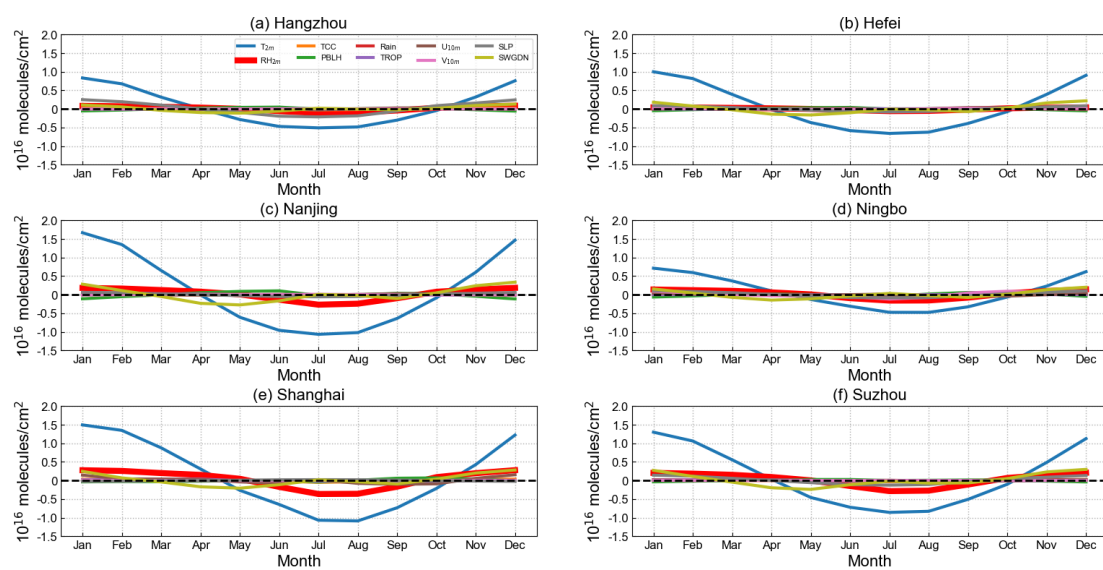

**Figure S2.** The contributions of each meteorological parameter to the month variations of tropospheric NO<sub>2</sub> VCDs over each YRD city.

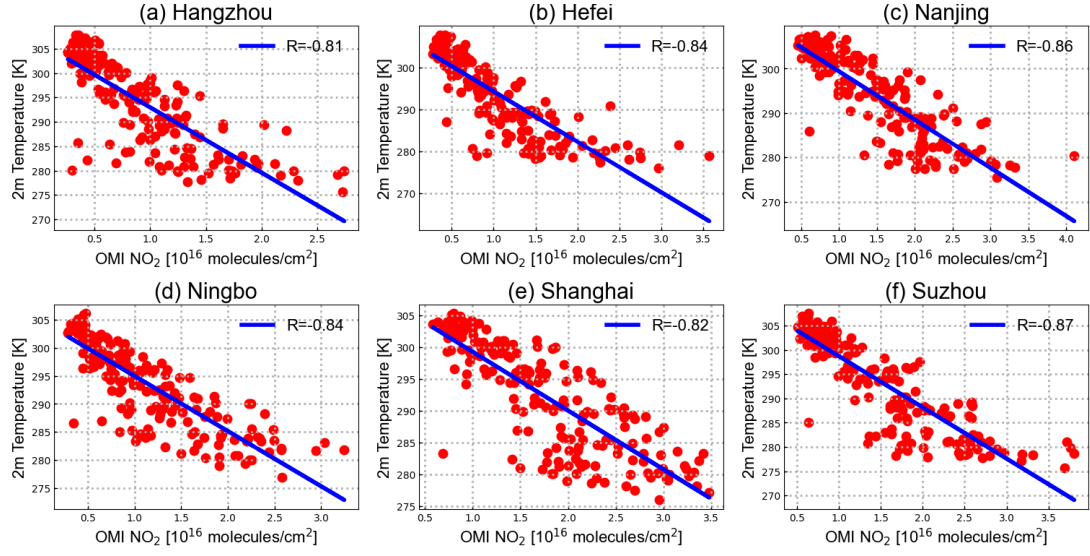

**Figure S3.** The correlations between monthly average of temperature and tropospheric NO<sub>2</sub> VCDs.

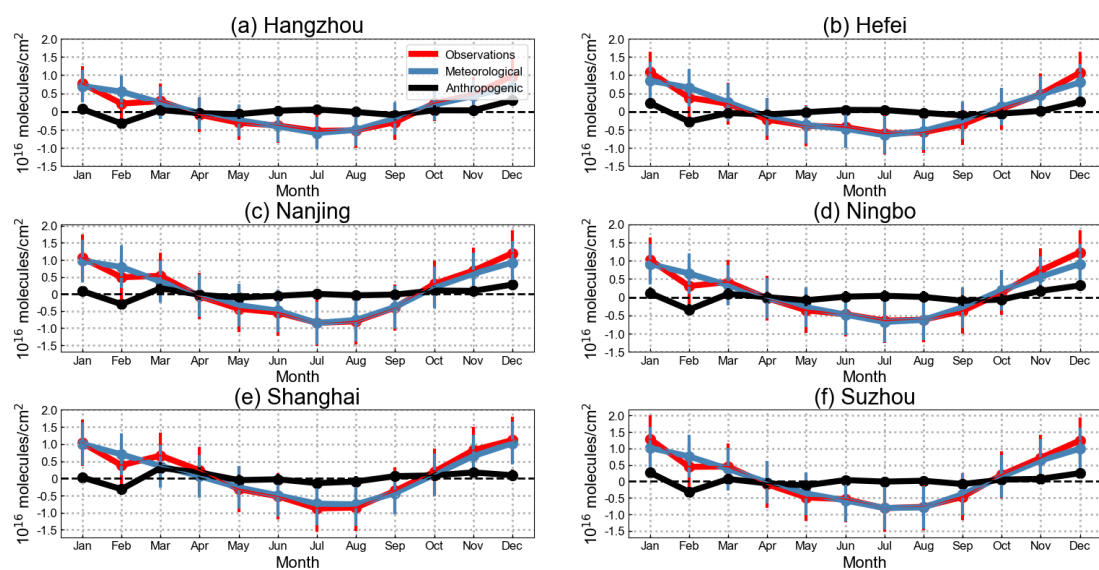

**Figure S4.** The monthly average of tropospheric NO<sub>2</sub> VCDs and its effect by only meteorological drivers and related anthropogenic drivers in main cities over YRD during 2005-2019.

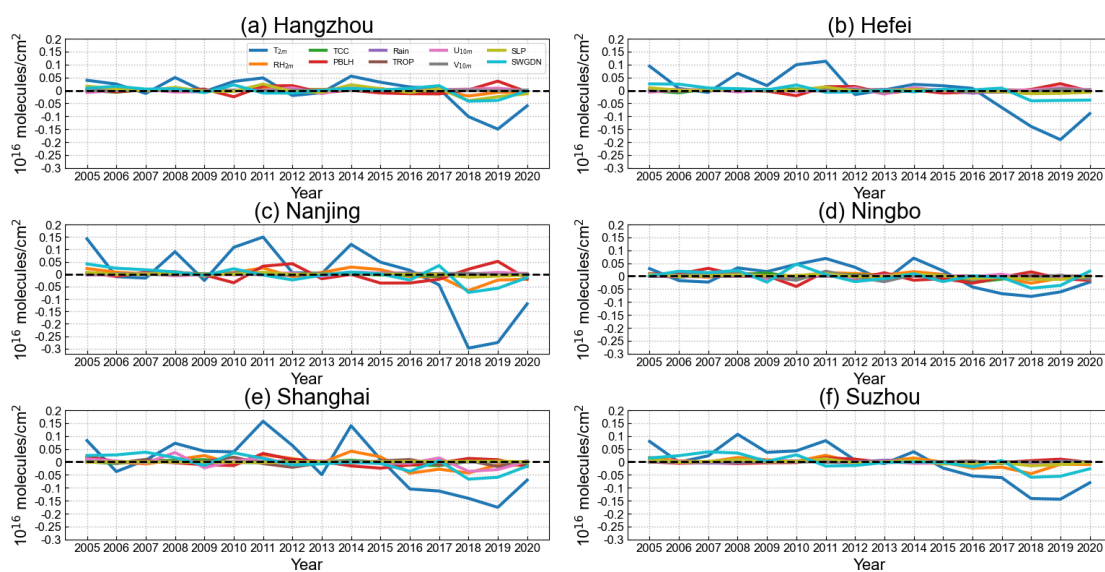

**Figure S5.** The contributions of each meteorological parameter to the annual variations of tropospheric NO<sub>2</sub> VCDs over each YRD city.

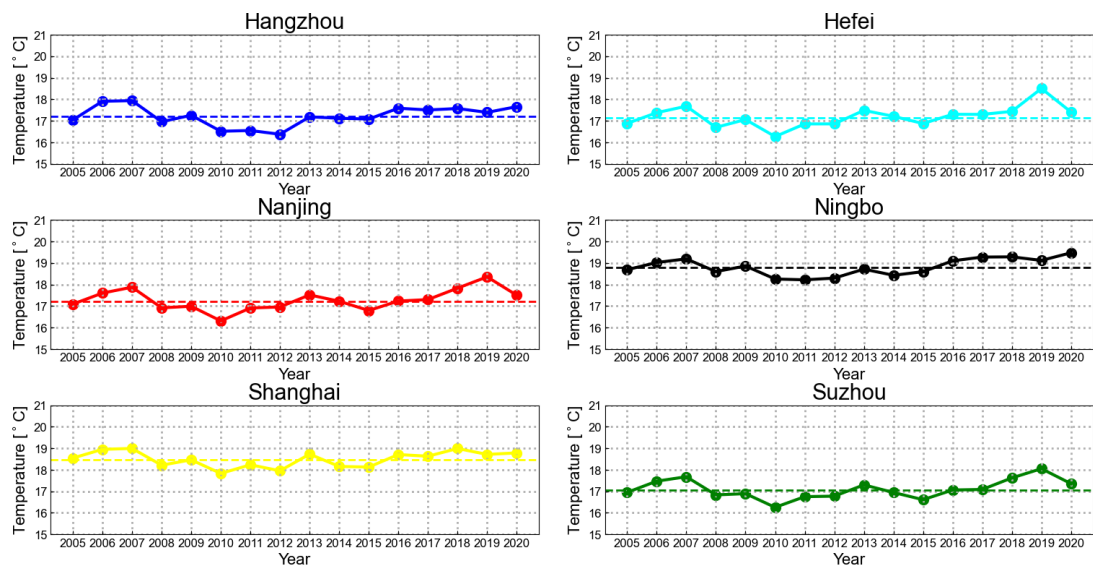

**Figure S6.** The annual average of surface temperature in main cities over YRD during 2005-2020.

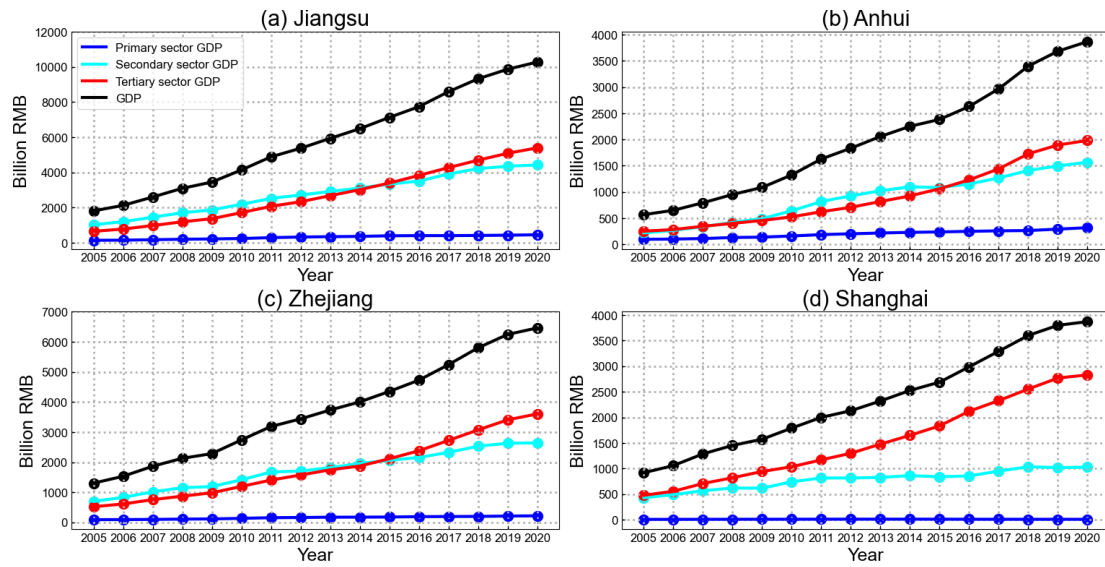

**Figure S7.** The value of GDP for total (black dots and lines), primary sector (blue dots and lines), secondary sector (cyan dots and lines) and tertiary sector (red dots and lines), in Jiangsu Province from 2006 to 2020, Anhui Province, Zhejiang Province and Shanghai city, respectively.
